# Supplementary material for: Plasmon induced hot carrier generation in a pyridine@Au20 composite
Source: Royal Society of Chemistry journal article supplement (doi:10.1039/d3cp02907g), 2023-01-01
Supplement: d3cp02907g1.pdf [file d3cp02907g1.pdf]

## Supporting Information

### **Plasmon induced hot carrier generation in pyridine@Au<sub>20</sub> composite**

Junais Habeeb Mokkath

[j.mokath@kcst.edu.kw](mailto:j.mokath@kcst.edu.kw)

Quantum Nanophotonics Simulations Lab, Department of Physics, Kuwait College of Science And  
Technology, Doha Area, 7th Ring Road, P.O. Box 27235, Kuwait.

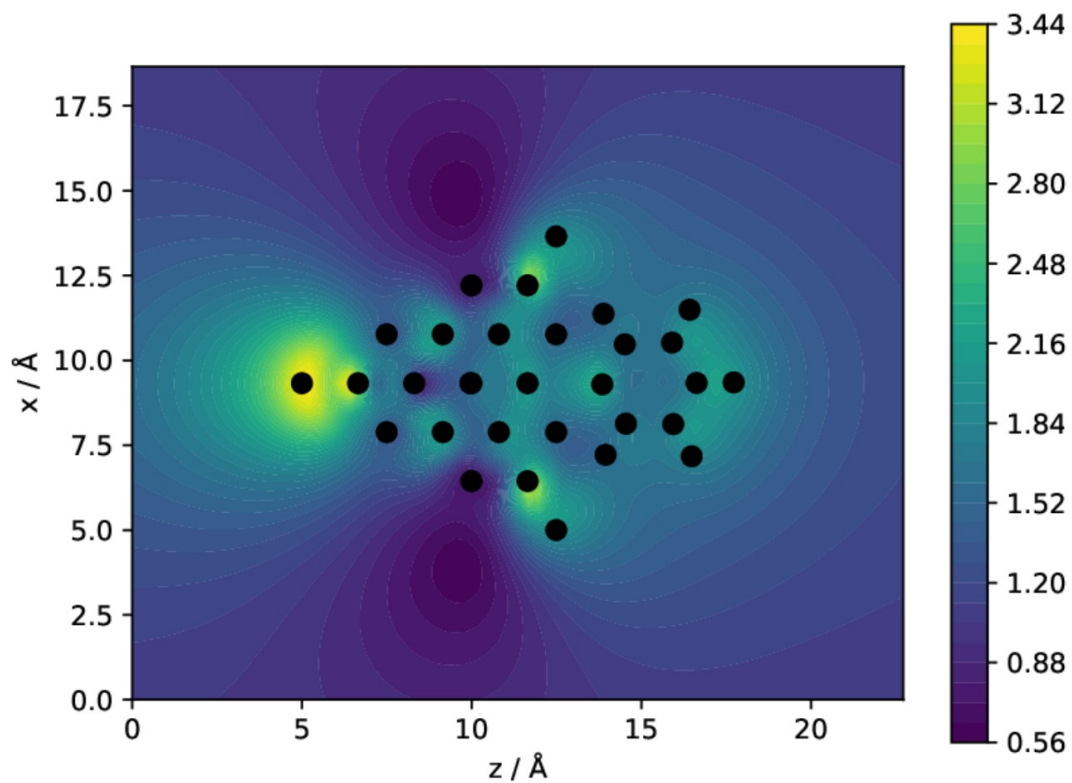

Figure S1: Electric field enhancement computed through rt-TDDFT for the pyridine@Au<sub>20</sub> cluster, where the pyridine molecule is situated at the center of the Au<sub>20</sub> surface.
